# Supplementary material for: High throughput protein-protein interaction data: clues for the architecture of protein complexes
Source: PubMed Central journal article supplement (PMC2621150; doi:10.1186/1477-5956-6-32), 2008-11-26
Supplement: 1477-5956-6-32-S1.pdf [file 1477-5956-6-32-S1.pdf]

**Additional File 1.** Compilation of high-throughput data for the 19S RP and 20S CP proteasomal subunits, as well as other proteins in Complexes 2 and 75 in Gavin *et al.*<sup>12</sup>

| Complex             | Subcomplex                    | OLN          | Gene Name    | Gavin 2        | Gavin 75       |        |
|---------------------|-------------------------------|--------------|--------------|----------------|----------------|--------|
| 19S RP <sup>a</sup> | Base                          | YGR232W      | <i>NAS6</i>  | M(93)          | M(93)          |        |
|                     |                               | YHR027C      | <i>RPN1</i>  | –              | C              |        |
|                     |                               | YIL075C      | <i>RPN2</i>  | A              | A              |        |
|                     |                               | YLR421C      | <i>RPN13</i> | –              | C              |        |
|                     |                               | YKL145W      | <i>RPT1</i>  | –              | C              |        |
|                     |                               | YDL007W      | <i>RPT2</i>  | –              | A              |        |
|                     |                               | YDR394W      | <i>RPT3</i>  | –              | A              |        |
|                     |                               | YOR259C      | <i>RPT4</i>  | –              | A              |        |
|                     |                               | YOR117W      | <i>RPT5</i>  | –              | A              |        |
|                     | YGL048C                       | <i>RPT6</i>  | –            | A              |                |        |
|                     |                               | Hinge        | YHR200W      | <i>RPN10</i>   | A              | C      |
|                     |                               | Lid          | YER021W      | <i>RPN3</i>    | M(93)          | M(93)  |
|                     |                               |              | YDL147W      | <i>RPN5</i>    | –              | C      |
|                     |                               |              | YDL097C      | <i>RPN6</i>    | –              | C      |
|                     |                               |              | YPR108W      | <i>RPN7</i>    | –              | C      |
|                     |                               |              | YOR261C      | <i>RPN8</i>    | A              | C      |
|                     |                               |              | YDR427W      | <i>RPN9</i>    | –              | C      |
|                     |                               |              | YFR004W      | <i>RPN11</i>   | –              | C      |
|                     |                               |              | YFR052W      | <i>RPN12</i>   | –              | C      |
|                     |                               |              | YDR363W-A    | <i>RPN15</i>   | –              | –      |
| 20S CP <sup>b</sup> | $\alpha$ ring                 | YMR314W      | <i>PRE5</i>  | A              | A              |        |
|                     |                               | YOL038W      | <i>PRE6</i>  | C <sup>c</sup> | M(141)         |        |
|                     |                               | YML092C      | <i>PRE8</i>  | C <sup>d</sup> | M(57)          |        |
|                     |                               | YGR135W      | <i>PRE9</i>  | A              | A              |        |
|                     |                               | YOR362C      | <i>PRE10</i> | C <sup>c</sup> | M(141)         |        |
|                     |                               | YGR253C      | <i>PUP2</i>  | –              | –              |        |
|                     |                               | YGL011C      | <i>SCL1</i>  | C <sup>c</sup> | M(141)         |        |
|                     |                               | $\beta$ ring | YER012W      | <i>PRE1</i>    | A              | A      |
|                     |                               |              | YPR103W      | <i>PRE2</i>    | C <sup>c</sup> | M(141) |
|                     |                               |              | YJL001W      | <i>PRE3</i>    | C <sup>c</sup> | M(141) |
|                     |                               |              | YFR050C      | <i>PRE4</i>    | M(57)          | M(57)  |
|                     |                               |              | YBL041W      | <i>PRE7</i>    | A              | A      |
|                     |                               |              | YOR157C      | <i>PUP1</i>    | –              | –      |
|                     |                               |              | YER094C      | <i>PUP3</i>    | C <sup>c</sup> | M(141) |
|                     |                               |              |              |                |                |        |
| Other               | Proteasome activator          | YFL007W      | <i>BLM3</i>  | A              | A              |        |
|                     | Cell division control protein | YJL194W      | <i>CDC6</i>  | –              | A              |        |
|                     | Proteasome-associated protein | YHL030W      | <i>ECM29</i> | A              | C              |        |
|                     | U3 snoRNP protein             | YNL075W      | <i>IMP4</i>  | A              | –              |        |
|                     | DNA repair protein            | YLR035C      | <i>MLH2</i>  | A              | A              |        |
|                     | DNA repair protein            | YNL250W      | <i>RAD50</i> | –              | A              |        |
|                     | Suppressor of Rho3            | YPR032W      | <i>SRO7</i>  | –              | A              |        |
|                     | Deubiquitinating enzyme       | YFR010W      | <i>UBP6</i>  | –              | A              |        |
|                     | Uncharacterised protein       | YOL087C      | *            | –              | A              |        |
|                     | Uncharacterised protein       | YOL098C      | **           | –              | A              |        |

Within each subcomplex, the proteins have been listed alphabetically by gene name. For each protein, the ordered locus name (OLN), gene name, and classification in Gavin *et al.*<sup>12</sup> Complexes 2 and 75 ('Gavin 2' and 'Gavin 75' respectively) are provided. Gavin *et al.*<sup>12</sup> classified proteins as core proteins (C), attachment proteins (A), or into a module X (M(X)). Other proteins from Complexes 2 and 75 (that were not part of either proteasomal complex) have been included under 'Other', with a brief description of their function in the 'Subcomplex' column obtained from Swissprot ([www.expasy.ch](http://www.expasy.ch)) and Schmidt *et al.*<sup>39</sup>

\* (OLN YOL087C) and \*\* (OLN YOL098C) are novel proteins. The ribosomal protein Rps18b (OLN YML026C) was part of Complex 75 but was excluded from this table because ribosomal proteins are considered to be common, non specific contaminants that generate false positives.<sup>5</sup>

<sup>a</sup> The protein composition of the 19S RP was sourced from Schmidt *et al.*<sup>39</sup> and Walz *et al.*<sup>30</sup>. Since Nas6 interacts with the ATPase ring (in the 19S RP base) via Rpt3, it was assumed that Nas6 is also part of the 19S RP base.

<sup>b</sup> The protein composition of the 20S RP was sourced from Baumeister *et al.*<sup>37</sup>

<sup>c</sup> This protein was classified as both a core and Module 141 protein by Gavin *et al.*<sup>12</sup> in Complex 2.

<sup>d</sup> This protein was classified as both a core and Module 57 protein by Gavin *et al.*<sup>12</sup> in Complex 2.
