# Supplementary material for: High throughput protein-protein interaction data: clues for the architecture of protein complexes
Source: PubMed Central journal article supplement (PMC2621150; doi:10.1186/1477-5956-6-32), 2008-11-26
Supplement: 1477-5956-6-32-S2.pdf [file 1477-5956-6-32-S2.pdf]

**Additional File 2.** Compilation of high-throughput data for proteins in the mediator and SAGA complexes and associated proteins described in Complex 81 and 445 in Gavin *et al.*<sup>12</sup>

| Complex               | Subcomplex                | OLN                     | Gene Name                | Gavin 81    | Gavin 445      |   |
|-----------------------|---------------------------|-------------------------|--------------------------|-------------|----------------|---|
| Mediator <sup>a</sup> | Head                      | YHR058C                 | <i>MED6</i>              | M(85)       | C <sup>d</sup> |   |
|                       |                           | YBR193C                 | <i>MED8</i>              | –           | C              |   |
|                       |                           | YMR112C                 | <i>MED11</i>             | –           | C              |   |
|                       |                           | YER022W                 | <i>MED17</i>             | –           | C              |   |
|                       |                           | YGR104C                 | <i>MED18</i>             | –           | C              |   |
|                       |                           | YBL093C                 | <i>MED19</i>             | –           | –              |   |
|                       |                           | YHR041C                 | <i>MED20</i>             | –           | C              |   |
|                       |                           | YBR253W                 | <i>MED22</i>             | –           | C              |   |
|                       | Middle                    | YPR070W                 | <i>MED1</i>              | –           | C              |   |
|                       |                           | YOR174W                 | <i>MED4</i>              | A           | A              |   |
|                       |                           | YOL135C                 | <i>MED7</i>              | –           | C              |   |
|                       |                           | YNR010W                 | <i>MED9</i>              | –           | C              |   |
|                       |                           | YPR168W                 | <i>MED10</i>             | –           | C              |   |
|                       |                           | YDR308C                 | <i>MED21</i>             | –           | C              |   |
|                       |                           | YGL127C                 | <i>MED31</i>             | –           | –              |   |
|                       | Tail                      | YDL005C                 | <i>MED2</i>              | –           | –              |   |
|                       |                           | YGL025C                 | <i>MED3</i>              | A           | C              |   |
|                       |                           | YGL151W                 | <i>MED5</i>              | A           | C              |   |
|                       |                           | YLR071C                 | <i>MED14</i>             | –           | C              |   |
|                       |                           | YOL051W                 | <i>MED15</i>             | –           | C              |   |
|                       |                           | YNL236W                 | <i>MED16</i>             | A           | C              |   |
|                       | CDK Module                | YCR081W                 | <i>SRB8</i>              | –           | C              |   |
|                       |                           | YDR443C                 | <i>SRB9</i>              | –           | C              |   |
|                       |                           | YPL042C                 | <i>SRB10</i>             | –           | A              |   |
|                       |                           | YNL025C                 | <i>SRB11</i>             | –           | –              |   |
|                       | SAGA <sup>b</sup>         | Domain I                | YHR099W                  | <i>TRA1</i> | A              | – |
|                       |                           | Domains II, III, and IV | YPL254W                  | <i>ADA1</i> | C              | A |
|                       |                           |                         | YDR448W                  | <i>ADA2</i> | C              | A |
| YDR176W               |                           |                         | <i>ADA3</i>              | C           | A              |   |
| YGR252W               |                           |                         | <i>GCN5</i>              | M(84)       | A              |   |
| YBR081C               |                           |                         | <i>SPT7</i>              | C           | A              |   |
| YBR198C               |                           |                         | <i>TAF5</i>              | A           | –              |   |
| YGL112C               |                           |                         | <i>TAF6</i>              | A           | –              |   |
| YMR236W               |                           |                         | <i>TAF9<sup>c</sup></i>  | M(146)      | –              |   |
| YDR167W               |                           |                         | <i>TAF10<sup>c</sup></i> | M(84)       | –              |   |
| YDR145W               |                           |                         | <i>TAF12</i>             | M(146)      | –              |   |
| Domain V              |                           | YDR392W                 | <i>SPT3</i>              | C           | A              |   |
|                       |                           | YLR055C                 | <i>SPT8</i>              | C           | A              |   |
|                       |                           | YOL148C                 | <i>SPT20</i>             | C           | A              |   |
| Other <sup>c</sup>    |                           | YER164W                 | <i>CHD1</i>              | –           | –              |   |
|                       |                           | YPL047W                 | <i>SGF11</i>             | –           | –              |   |
|                       |                           | YCL010C                 | <i>SGF29</i>             | C           | A              |   |
|                       |                           | YGL066W                 | <i>SGF73</i>             | C           | A              |   |
|                       | YBR111W-A                 | <i>SUS1</i>             | –                        | –           |                |   |
|                       | YMR223W                   | <i>UBP8</i>             | A                        | A           |                |   |
| Other                 | NuA4, INO80, SWR1 subunit | YJL081C                 | <i>ARP4</i>              | A           | –              |   |
|                       | NuA4 complex subunit      | YFL024C                 | <i>EPL1</i>              | A           | –              |   |
|                       | NuA4 complex subunit      | YOR244W                 | <i>ESA1</i>              | A           | –              |   |
|                       | NuA4 complex subunit      | YDR359C                 | <i>VID21</i>             | A           | A              |   |
|                       | Type III PIP kinase       | YFR019W                 | <i>FAB1</i>              | –           | A              |   |

|                                 |         |              |        |       |
|---------------------------------|---------|--------------|--------|-------|
| Coproporphyrinogen III oxidase  | YDR044W | <i>HEM13</i> | A      | –     |
| Myosin-like protein 1           | YKR095W | <i>MLP1</i>  | –      | A     |
| Mitochondrial ribosomal subunit | YHR147C | <i>MRPL6</i> | –      | A     |
| ATP-dependent helicase          | YMR080C | <i>NAM7</i>  | A      | –     |
| Transcription factor            | YGL013C | <i>PDR1</i>  | A      | –     |
| Serine/threonine kinase         | YAL017W | <i>PSK1</i>  | A      | –     |
| Rab guanine exchange factor     | YNL272C | <i>SEC2</i>  | A      | –     |
| SWI/SNF complex subunit         | YNR023W | <i>SNF12</i> | A      | A     |
| TATA-box-binding protein        | YER148W | <i>SPT15</i> | A      | –     |
| Heat shock protein              | YBR169C | <i>SSE2</i>  | –      | A     |
| TFIID subunit                   | YGR274C | <i>TAF1</i>  | M(146) | –     |
| TFIID subunit                   | YPL011C | <i>TAF3</i>  | M(146) | –     |
| TFIID subunit                   | YMR005W | <i>TAF4</i>  | M(146) | –     |
| TFIID subunit                   | YMR227C | <i>TAF7</i>  | A      | –     |
| TFIID subunit                   | YML015C | <i>TAF11</i> | M(146) | –     |
| Cell morphogenesis protein      | YIL129C | <i>TAO3</i>  | A      | –     |
| Valyl-tRNA synthetase           | YGR094W | <i>VAS1</i>  | A      | –     |
| Transcription factor            | YML007W | <i>YAP1</i>  | M(85)  | M(85) |

Within each subcomplex, the proteins have been listed alphabetically by gene name. For each protein, the ordered locus name (OLN), gene name, and its classification in Gavin *et al.*<sup>12</sup> Complex 81 and 445 ('Gavin 81' and 'Gavin 445' respectively) have been provided. Gavin *et al.*<sup>12</sup> classified proteins as core proteins (C), attachment proteins (A), or into a module X (M(X)). Other proteins from Complex 445 (that were not part of either coactivator complex) have also been included under 'Other', with a brief description of their function in the 'Subcomplex' column obtained from Swissprot ([www.expasy.ch](http://www.expasy.ch)). The ribosomal proteins Rpl8a (OLN YHL033C), Rpl14a (OLN YKL006W), Rpl17b (OLN YJL177W), Rpl18b (OLN YOL120C), Rpl19b (OLN YBL027W), Rpl30 (OLN YGL030W), Rpl33a (OLN YPL143W), Rpl35b (OLN YDL136W), Rps14b (ONL YJL191W), and Rps17b (OLN YDR447C) were part of Complex 445, but were excluded from this table because ribosomal proteins are considered to be common, non-specific contaminants that generate false positives.<sup>5</sup> The proteins shaded in grey are also components of the NuA4 complex.

<sup>a</sup> The protein composition of the mediator was sourced from Chadick and Asturias<sup>23</sup> and Guglielmi *et al.*<sup>24</sup>, with the exception that Med5 has recently been shown to be part of the tail subcomplex. Baidoobonso *et al.*<sup>25</sup> assignment of Med19 into the middle subcomplex was not taken into account in this table.

<sup>b</sup> The protein composition of the SAGA complex was sourced from <sup>26,27</sup> and <sup>28</sup> and the proteins were allocated to five domains as outlined by Timmers and Tora<sup>27</sup>. Domains II, III, and IV were combined together due to the shared subunits in these domains (specifically, Taf5 and Taf10 are found in Domains II and III, Taf6 and Taf9 are found in Domains II and IV, Ada1 and Taf12 are found in Domains III and IV).

<sup>c</sup> These proteins were defined as part of the SAGA complex after the allocation of domains<sup>27</sup>.

<sup>d</sup> Med6 was classified as both a core and Module 85 protein by Gavin *et al.*<sup>12</sup>
