# Supplementary material for: High throughput protein-protein interaction data: clues for the architecture of protein complexes
Source: Proteome Sci. 2008 Nov 26;6:32. doi: 10.1186/1477-5956-6-32 (PMC2621150; doi:10.1186/1477-5956-6-32)
Supplement: Additional file 3 — Classification of proteasomal and coactivator protein subunits from Gavin et al [12]. A table showing core, module and attachment classification of proteins in the proteasomal and coactivator protein complexes. [file 1477-5956-6-32-S3.pdf]

**Additional File 3.** Classification of proteasomal and coactivator protein subunits from Gavin *et al.*<sup>12</sup>.

| Complex                                       | Classification     | Gavin <i>et al.</i> Complex |                  |
|-----------------------------------------------|--------------------|-----------------------------|------------------|
| Proteasomal complexes<br><i>19S RP</i> (20)   |                    | <b>Gavin 2</b>              | <b>Gavin 75</b>  |
|                                               | Core               | 0.0 (0)                     | 55 (11)          |
|                                               | Module             |                             |                  |
|                                               | <i>M(93)</i>       | 10 (2)                      | 10 (2)           |
|                                               | Attachment         | 15 (3)                      | 30 (6)           |
|                                               | None               | 75 (15)                     | 5.0 (1)          |
|                                               |                    |                             |                  |
|                                               | <i>20S CP</i> (14) |                             |                  |
|                                               | Core               | 50 (7)                      | 0.0 (0)          |
|                                               | Module             |                             |                  |
| Coactivator complexes<br><i>Mediator</i> (25) | <i>M(57)</i>       | 7.1 (1)                     | 14 (2)           |
|                                               | <i>M(141)</i>      | 0.0 (0)                     | 43 (6)           |
|                                               | Attachment         | 29 (4)                      | 29 (4)           |
|                                               | None               | 14 (2)                      | 14 (2)           |
|                                               |                    |                             |                  |
|                                               |                    | <b>Gavin 81</b>             | <b>Gavin 445</b> |
|                                               | Core               | 0 (0)                       | 76 (19)          |
|                                               | Module             |                             |                  |
|                                               | <i>M(85)</i>       | 4 (1)                       | 0 (0)            |
|                                               | Attachment         | 16 (4)                      | 8 (2)            |
| <i>SAGA</i> (20)                              | None               | 80 (20)                     | 16 (4)           |
|                                               | Core               | 45 (9)                      | 0.0 (0)          |
|                                               | Module             |                             |                  |
|                                               | <i>M(84)</i>       | 10 (2)                      | 0.0 (0)          |
|                                               | <i>M(146)</i>      | 10 (2)                      | 0.0 (0)          |
|                                               | Attachment         | 20 (4)                      | 55 (11)          |
|                                               | None               | 15 (3)                      | 45 (9)           |

For each complex listed in the left-hand column, the distribution of its subunits between core, module, and attachment types are provided for the main complexes from Gavin *et al.*'s<sup>12</sup> dataset that are discussed in the text. The bracketed number after the complex name refers to the number of proteins found within that complex – for example, '19S RP (20)' equates to 20 proteins being found in the 19S regulatory particle of the proteasome. 'Gavin X' refers to the Complex X and M(Y) refers to Module Y, as defined by Gavin *et al.*<sup>12</sup>. The frequency of each classification type of protein is denoted by 'percentage (raw frequency)'. If a protein was classified as both a core and a module type within the same of one of Gavin *et al.*<sup>12</sup> complexes, then it was treated as a core protein during this analysis.
